# Supplementary material for: Propane dehydrogenation over Ce-containing ZSM-5 supported platinum–tin catalysts: Ce concentration effect and reaction performance analysis
Source: Royal Society of Chemistry journal article supplement (doi:10.1039/c6ra04173f), 2016-01-01
Supplement: c6ra04173f1.pdf [file c6ra04173f1.pdf]

## Electronic Supplementary Information

### Propane dehydrogenation over the Ce-containing ZSM-5 supported platinum-tin catalysts: Ce concentration effect and reaction performance analysis

Yiwei Zhang,<sup>a</sup> Mengwei Xue,<sup>b</sup> Yuming Zhou,<sup>a\*</sup> Hongxing Zhang,<sup>a</sup>

Wen Wang<sup>a</sup>, Qianli Wang,<sup>a</sup> Xiaoli Sheng<sup>a</sup>

<sup>a</sup> *School of Chemistry and Chemical Engineering, Southeast University, Nanjing 211189, P.R.China*

<sup>b</sup> *Biochemical and Environmental Engineering College, Nanjing Xiaozhuang University, Nanjing 211171, P.R.China*

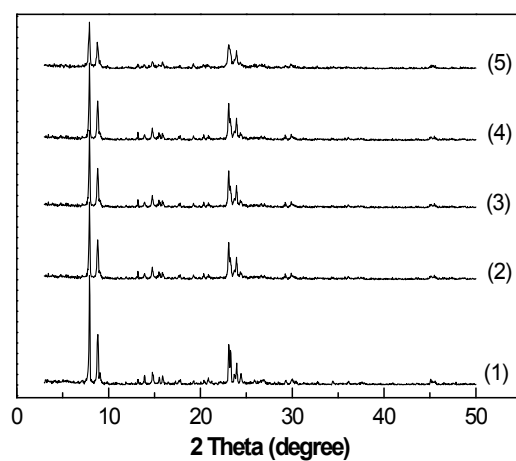

**Fig. S1** XRD patterns of different samples:

- (1) Ce(0%)-ZSM-5; (2) Ce(0.35%)-ZSM-5; (3) Ce(0.76%)-ZSM-5;  
(4) Ce(1.15%)-ZSM-5; (5) Ce(1.58%)-ZSM-5

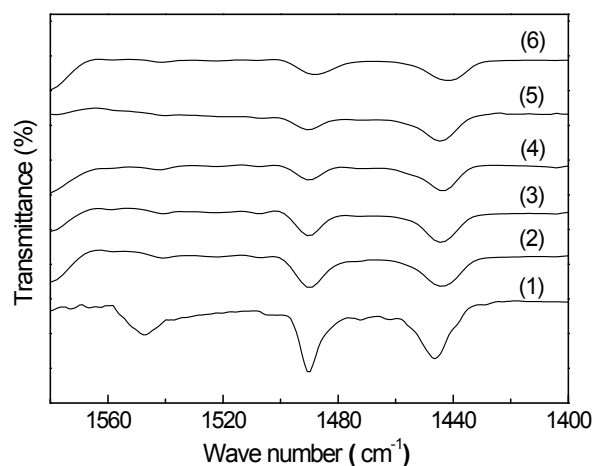

**Fig. S2** IR spectra of pyridine adsorbed for different samples: (1) Ce(0%)-ZSM-5; (2) PtSnNa/Ce(0%)ZSM-5; (3) PtSnNa/Ce(0.35%)ZSM-5; (4) PtSnNa/Ce(0.76%)ZSM-5; (5) PtSnNa/Ce(1.15%)ZSM-5; (6) PtSnNa/Ce(1.58%)ZSM-5.

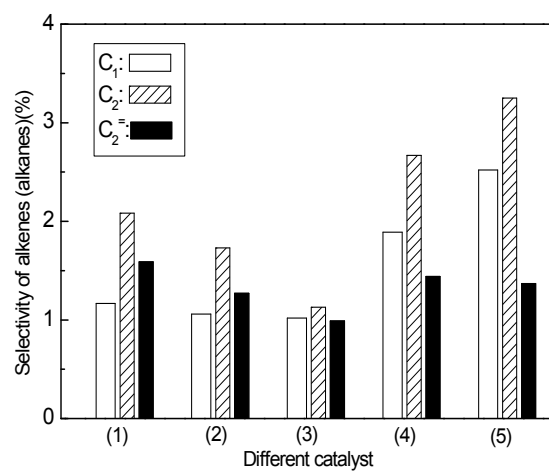

**Fig. S3** Selectivities to alkenes (alkanes) of the different catalysts after reaction for 10 h: (1) PtSnNa/Ce(0%)ZSM-5; (2) PtSnNa/Ce(0.35%)ZSM-5; (3) PtSnNa/Ce(0.76 %)ZSM-5; (4) PtSnNa/Ce(1.15 %)ZSM-5; (5) PtSnNa/Ce(1.58 %)ZSM-5. Reaction conditions: 590 °C,  $n(\text{H}_2)/n(\text{C}_3\text{H}_8)=0.25$ ,  $m(\text{cat})=2.0$  g,  $\text{WHSV}=3.0\text{h}^{-1}$ .

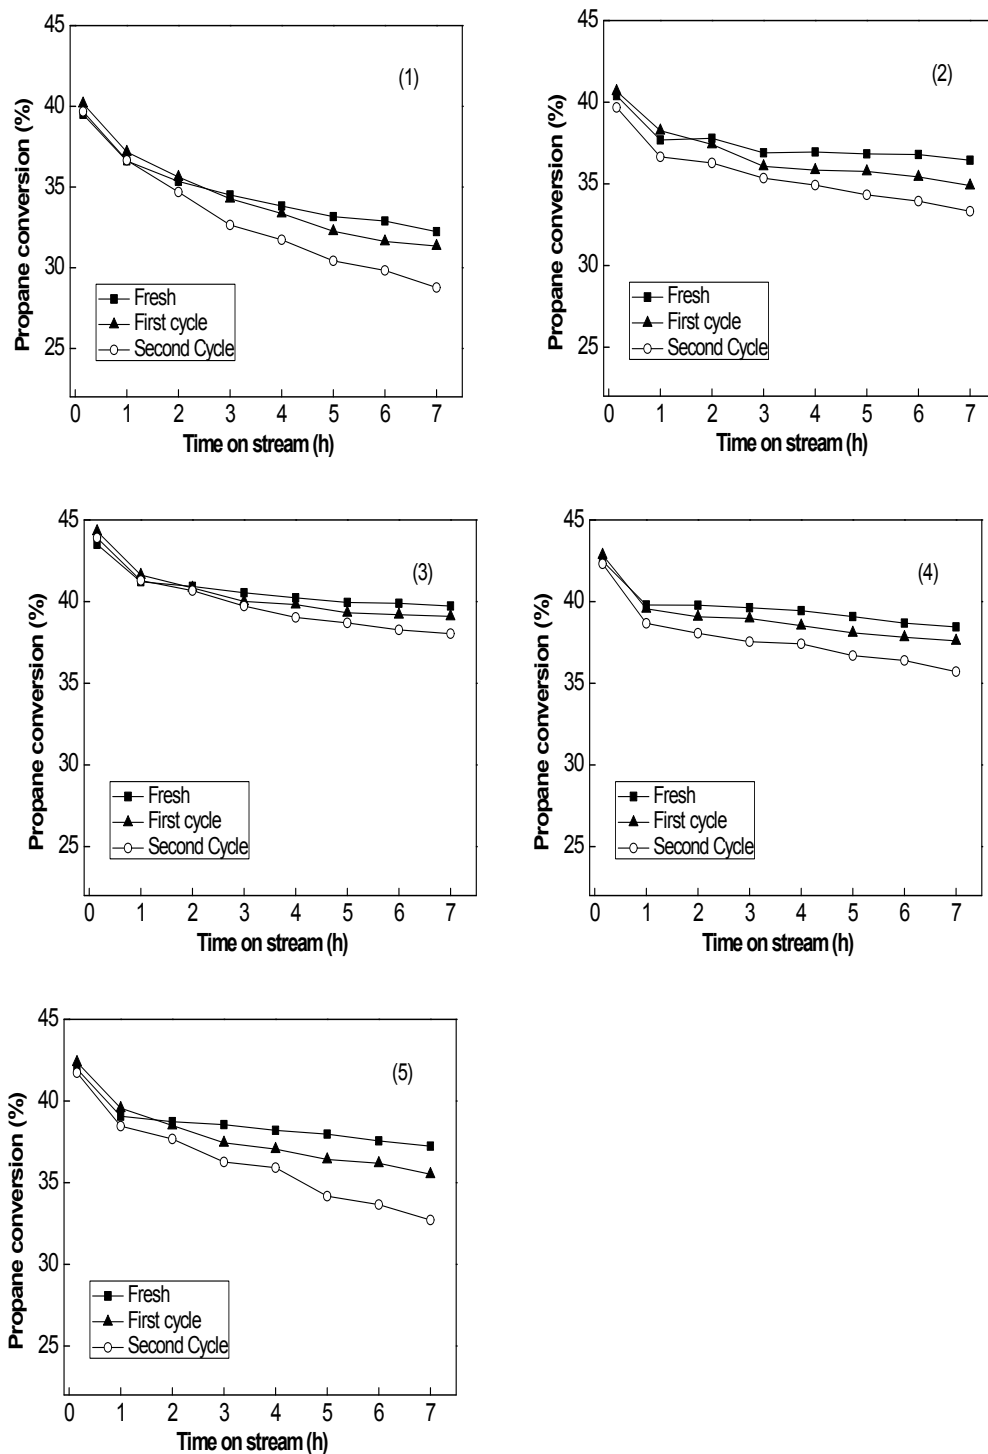

**Fig. S4** The performance comparison of the different catalysts in the dehydrogenation of propane at 590 °C: (1) PtSnNa/Ce(0%)ZSM-5; (2)PtSnNa/Ce(0.35%)ZSM-5; (3)PtSnNa/Ce(0.76%)ZSM-5;(4)PtSnNa/Ce(1.15%)ZSM-5; (5) PtSnNa/Ce(1.58%)ZSM-5.

Regeneration conditions: catalyst regeneration was performed by oxidative treatment using pure air (40ml/min) for 2h at 500 °C. Then, the catalyst was reduced in flowing pure hydrogen (40ml/min) for 4h at 500 °C.
